# Supplementary material for: Mesoporous silica-giant particle with slit pore arrangement as an adsorbent for heavy metal oxyanions from aqueous medium
Source: Royal Society of Chemistry journal article supplement (doi:10.1039/c4ra12175a), 2014-12-19
Supplement: c4ra12175a1.pdf [file c4ra12175a1.pdf]

## Supporting information

### **Mesoporous silica-giant particle with slit pore arrangement as adsorbent for heavy metal oxyanions from aqueous medium**

Seenu Ravi,<sup>a</sup> Roshith Roshan,<sup>a</sup> Jose Tharun,<sup>a</sup> Dae-Won park,<sup>a</sup> Ho-Hwan Chun,<sup>b</sup>  
Hyun Park<sup>b</sup> and Manickam Selvaraj,\*<sup>a</sup>

<sup>a</sup> *School of Chemical and Biomolecular Engineering, Pusan National University, Busan 609-735, Korea.*

<sup>b</sup> *Global Core Research Centre for Ships and Offshore Plants, Pusan National University, Busan 609 735, Korea*

\*Corresponding author, *E-mail:* [chems@pnu.edu](mailto:chems@pnu.edu); *Tel.:* +82 51 510 2397; *Fax:* +82 51 512 8563

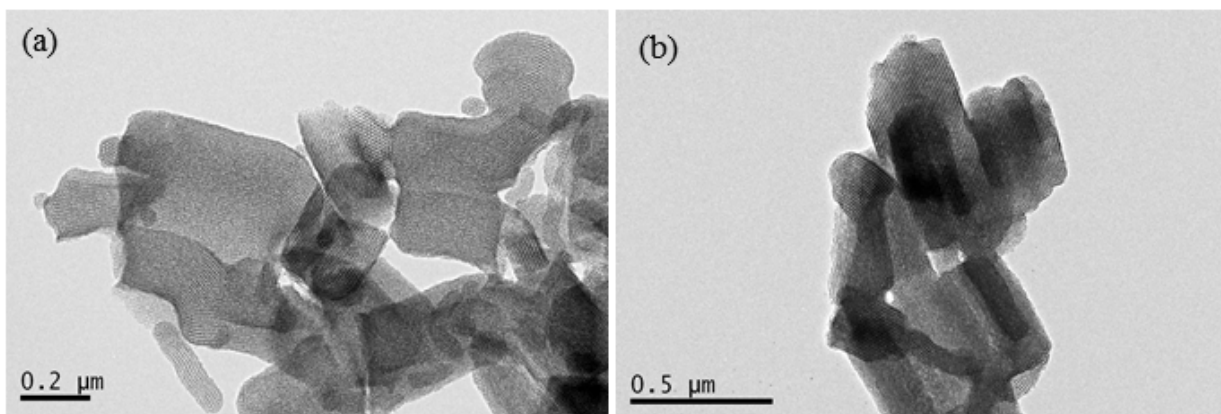

**Fig S1** TEM images of N-(2-Aminoethyl)-3-(trimethoxysilyl)propylamine (a) and 2-[2-(3-Trimethoxysilylpropylamino)ethylamino]ethylamine (b) functionalized IBN-4 mesoporous silica.

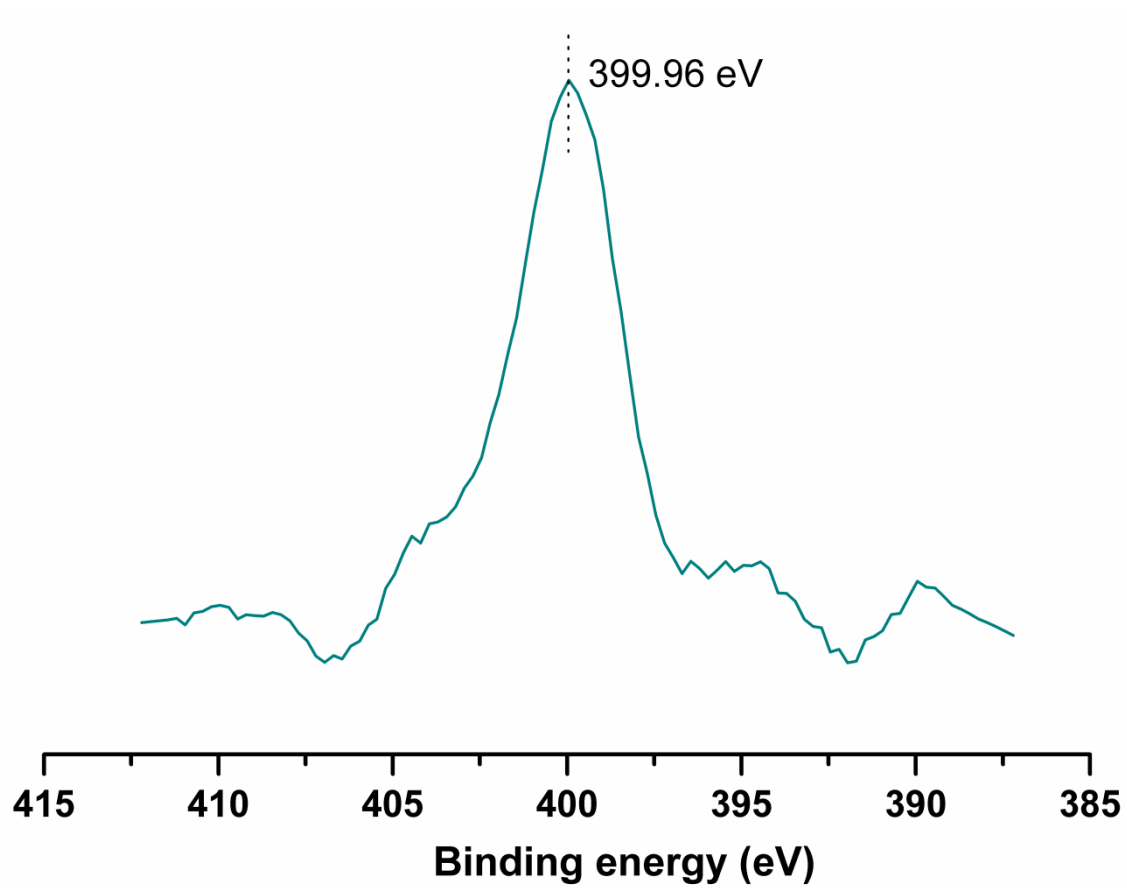

**Fig S2** XPS pattern for N1s region of amine group in ICMS-N15.

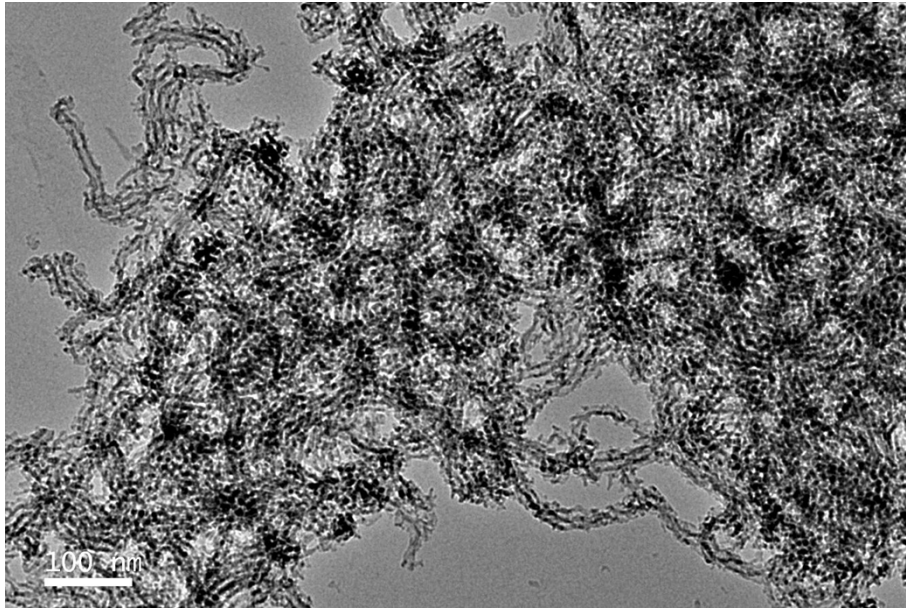

**Fig S3** Tem image of ICMS-N20

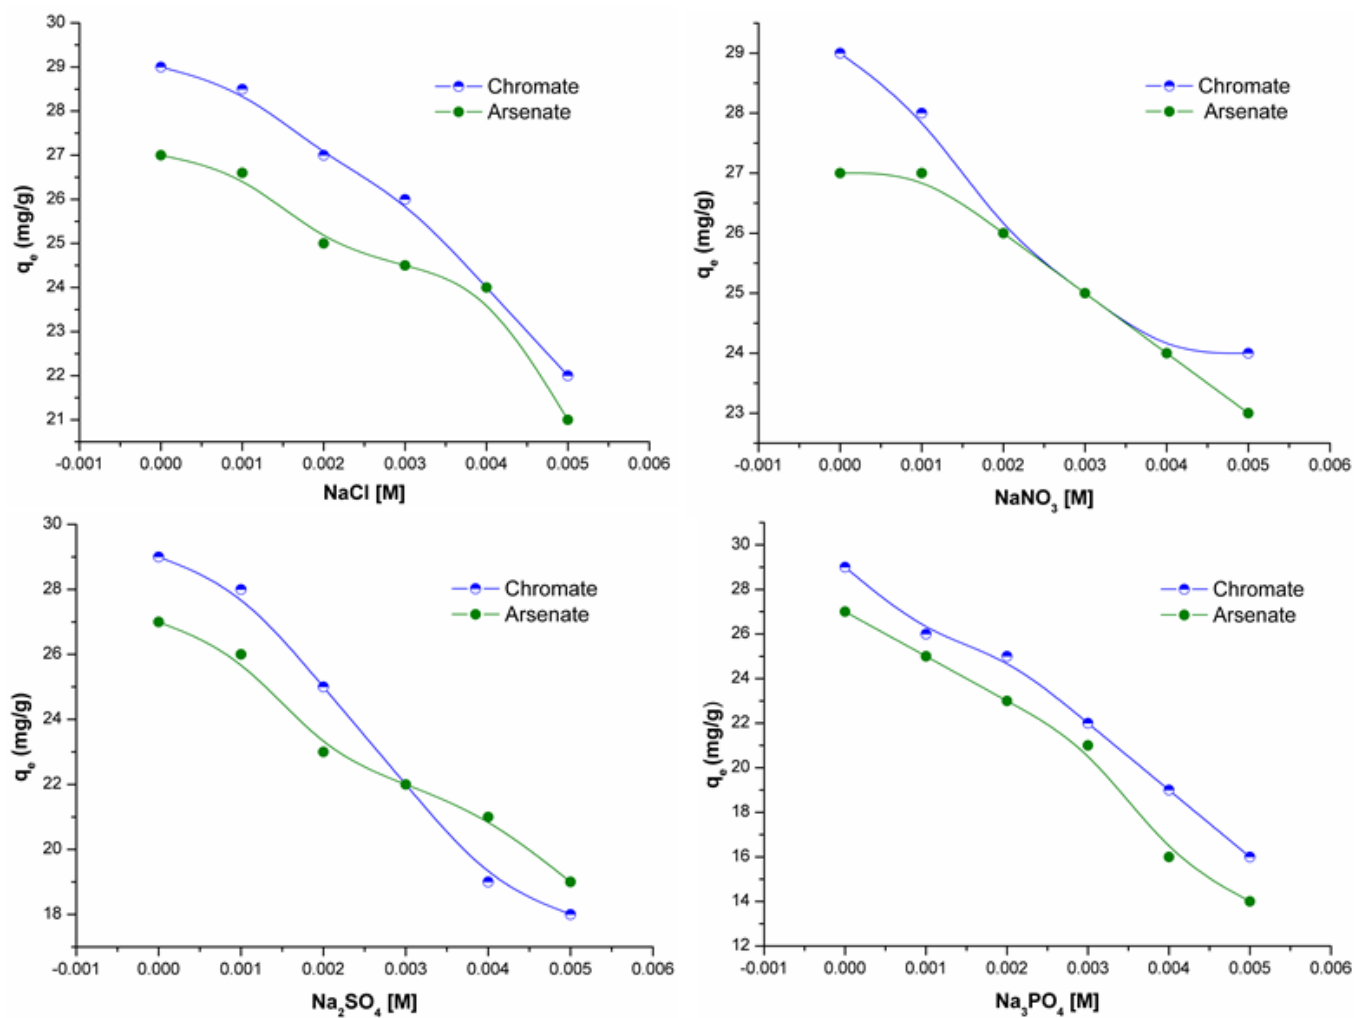

**Fig S4** Influence of NEAs on the adsorption of Arsenate and Chromate by ICMS-N15. Adsorption conditions: 50 mg silica, 50 ml of 50 ppm heavy metal solution, 25 °C, X mole of sodium salts of respective anions. [M]- Molarity of solution.

**Table S1** Comparison of amino and thiol functionalized hexagonal mesoporous silica materials for the adsorption of arsenate and chromate

| Adsorbent        | Organo functional group | adsorbate          | Adsorption capacity (mmol/g) | Stoichiometric ratio (N : oxy anion) | Ref       |
|------------------|-------------------------|--------------------|------------------------------|--------------------------------------|-----------|
| MCM-41           | Aminopropyl             | Arsenate, chromate | 0.45<br>0.45                 | 0.25<br>0.5                          | 11        |
| Imi-SBA-15       | imidazole               | chromate           | 0.97                         | 0.5                                  | 32        |
| SBA-15           | Polyamines              | Arsenate           | 0.26–0.62                    | 0.15-0.37                            | 47        |
| HMS              | Mercaptopropyl          | Arsenite           | 0.38–1.15                    | 0.04                                 | 48        |
| MCM-41           | Polyamines              | Arsenate           | 0.30–0.52                    | 0.24-0.18                            | 47        |
| ICMS-N15 (IBN-4) | Aminopropyl             | Arsenate, Chromate | 0.39<br>0.29                 | 0.26<br>0.19                         | This work |

Adsorption capacity were calculated based on  $\text{HAsO}_4^{2-}$  and  $\text{CrO}_4^{2-}$  ions
